# Supplementary material for: Electrospun hetero-CoP/FeP embedded in porous carbon nanofibers: enhanced Na+ kinetics and specific capacity
Source: Royal Society of Chemistry journal article supplement (doi:10.1039/d0nr07359h), 2020-01-01
Supplement: d0nr07359h1.pdf [file d0nr07359h1.pdf]

**Supporting information for**  
**Electrospun Hetero-CoP/FeP Embedded in Porous Carbon**  
**Nanofibers: Enhanced Na<sup>+</sup> Kinetics and Specific Capacity**

Liang Han<sup>a</sup>, Mutian Zhang<sup>a</sup>, Huanlei Wang<sup>a,\*</sup>, Ping Li<sup>a</sup>, Wenrui Wei<sup>a</sup>, Jing Shi<sup>a</sup>,  
Minghua Huang<sup>a</sup>, Zhicheng Shi<sup>a</sup>, Wei Liu<sup>a</sup> and Shougang Chen<sup>a,\*</sup>

*<sup>a</sup> School of Materials Science and Engineering, Ocean University of China, Qingdao,  
266100, People's Republic of China.*

E-mail: [huanleiwang@gmail.com](mailto:huanleiwang@gmail.com) (H. Wang); [sgchen@ouc.edu.cn](mailto:sgchen@ouc.edu.cn) (S. Chen)

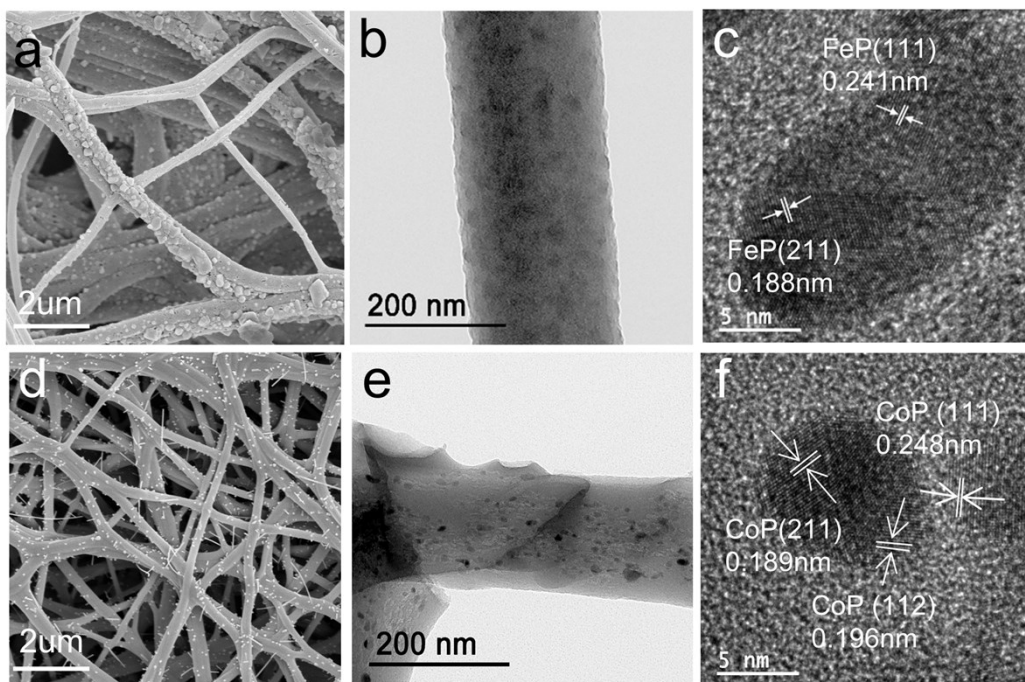

**Fig. S1** (a) SEM and (b, c) TEM images of FeP@PCNFs. (d) SEM and (e, f) TEM images of CoP@PCNFs.

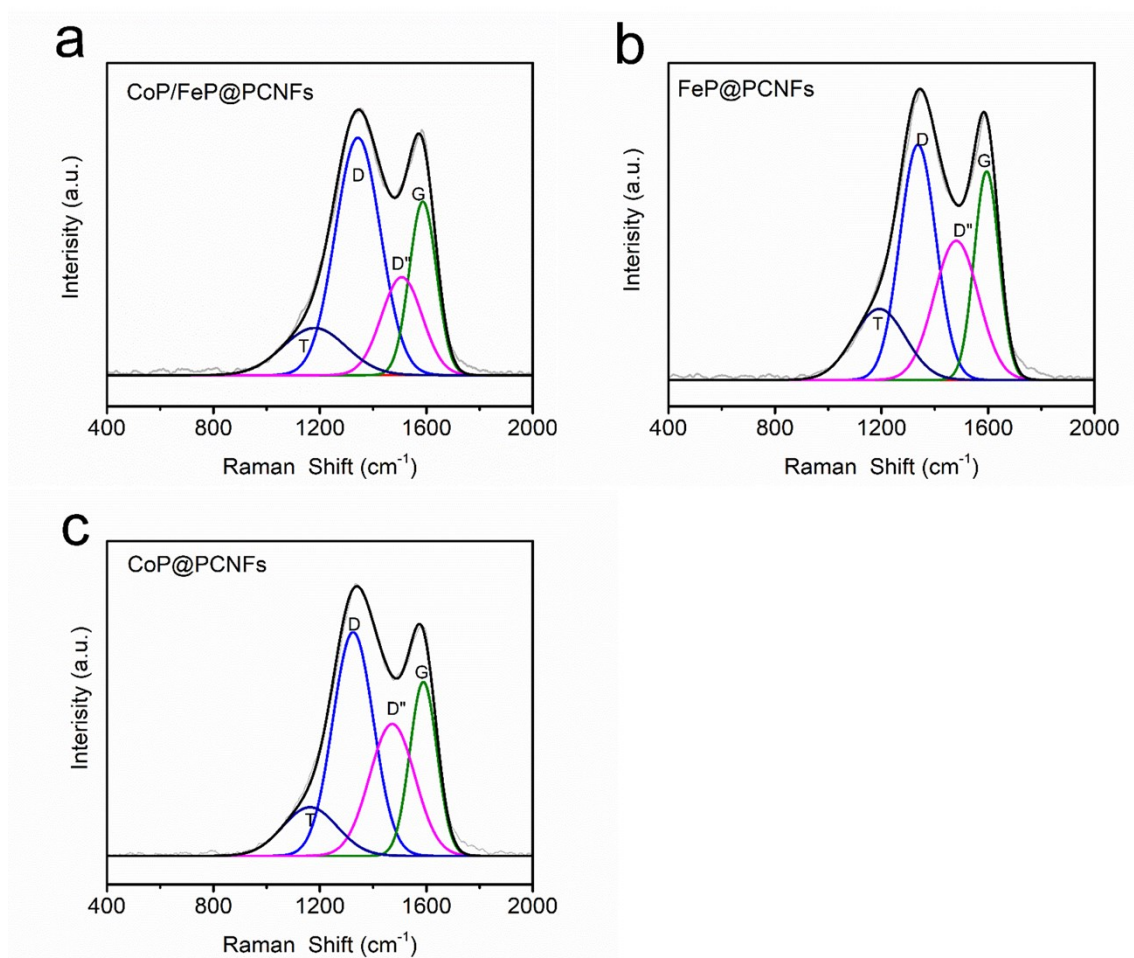

**Fig. S2** Fitted Raman spectra of (a) CoP/FeP@PCNFs, (b) FeP@PCNFs, and (c) CoP@PCNFs electrodes.

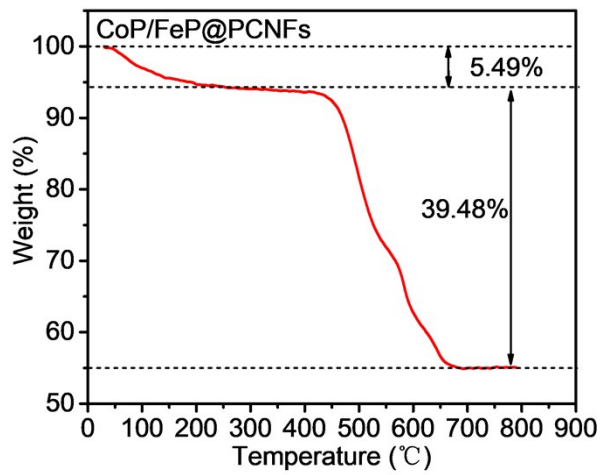

Fig. S3 TG curve of the CoP/FeP@PCNFs.

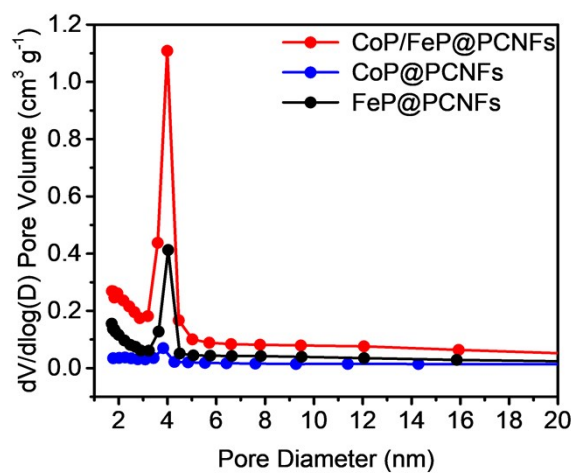

Fig. S4 BJH pore size distribution of CoP/FeP@PCNFs, CoP@PCNFs and FeP@PCNFs.

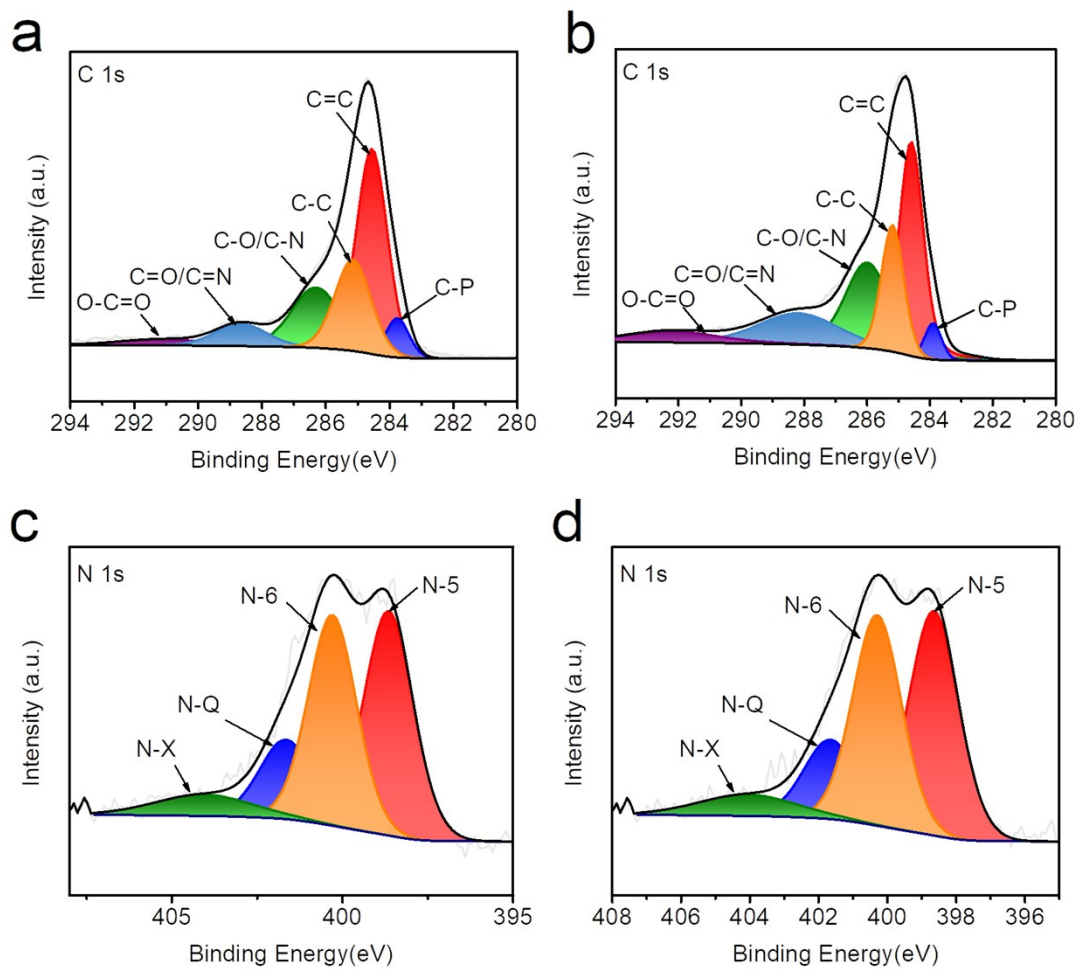

**Fig. S5** High-resolution C1s XPS spectra of (a) CoP@PCNFs and (b) FeP@PCNFs. High-resolution N1s XPS spectra of (c) CoP@PCNFs and (d) FeP@PCNFs.

**Table S1** Relative surface concentrations of nitrogen species in the three samples.

| Sample        | Relative peak areas (%) |     |      |      |
|---------------|-------------------------|-----|------|------|
|               | N-Q                     | N-X | N-5  | N-6  |
| CoP/FeP@PCNFs | 15.3                    | 7.5 | 40.2 | 37.0 |
| CoP@PCNFs     | 15.6                    | 7.6 | 39.5 | 37.3 |
| FeP@PCNFs     | 15.0                    | 8.0 | 40.6 | 36.4 |

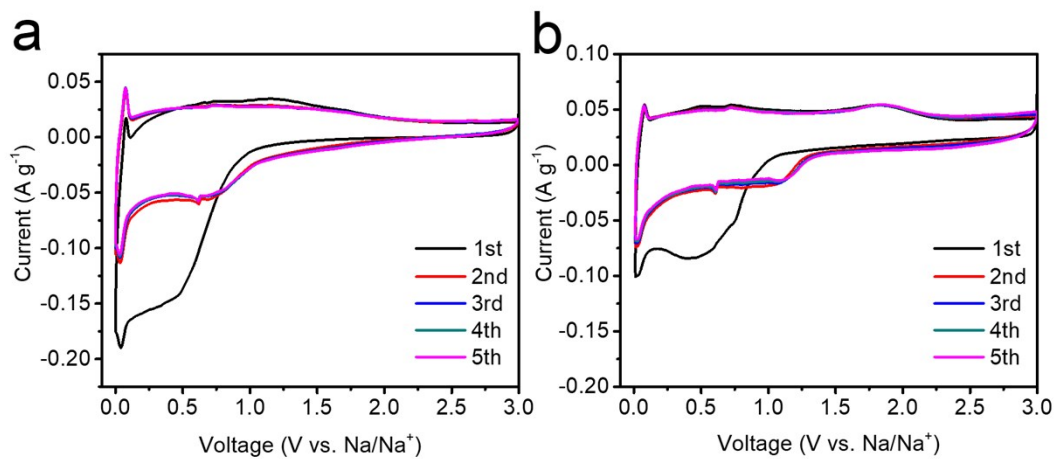

**Fig. S6** CV curves of the (a) CoP@PCNFs and (b) FeP@PCNFs electrodes at 0.1 mV s<sup>-1</sup>.

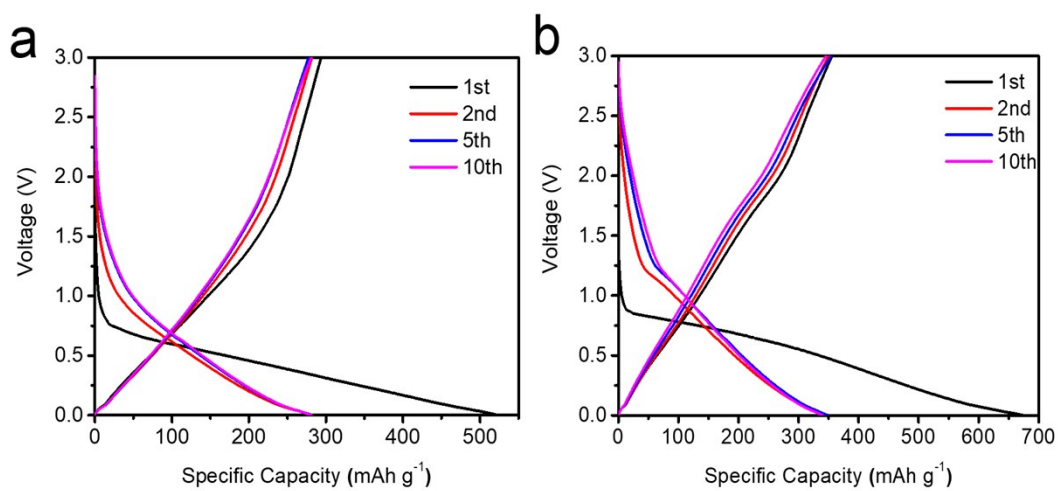

**Fig. S7** The typical galvanostatic discharge/charge curves of the (a)CoP@PCNFs and (b) FeP@PCNFs electrode at the current density of 0.05 A g<sup>-1</sup>.

**Table S2.** Comparison of sodium storage performance for the CoP/FeP@PCNFs with other metal phosphide-based electrodes.

| Materials                         | Electrolyte                                            | Rate capacity                                                                                            | Cycling stability                                                     | Ref. |
|-----------------------------------|--------------------------------------------------------|----------------------------------------------------------------------------------------------------------|-----------------------------------------------------------------------|------|
| CoP <sub>3</sub> @C               | 1 M NaClO <sub>4</sub> in EC/DEC+5%FE C                | 344.1 mAh g <sup>-1</sup> at 0.05A g <sup>-1</sup><br>136.4 mAh g <sup>-1</sup> at 2.5 A g <sup>-1</sup> | 144 mAh g <sup>-1</sup> after 260 cycles at 0.3A g <sup>-1</sup>      | 1    |
| Co <sub>2</sub> P@N-C@rGO         | 1M NaClO <sub>4</sub> in EC/DEC                        | 323 mAh g <sup>-1</sup> at 0.05A g <sup>-1</sup><br>200 mAh g <sup>-1</sup> at 0.5 A g <sup>-1</sup>     | 225 mAh g <sup>-1</sup> after 100 cycles at 0.05 A g <sup>-1</sup>    | 2    |
| CoP                               | 1M NaClO <sub>4</sub> in PC+5%FEC                      | 310 mAh g <sup>-1</sup> at 0.1A g <sup>-1</sup><br>80 mAh g <sup>-1</sup> at 2 A g <sup>-1</sup>         | 315 mAh g <sup>-1</sup> after 25 cycles at 0.1 A g <sup>-1</sup>      | 3    |
| MoP                               | 1M NaClO <sub>4</sub> in PC+5%FEC                      | 387 mAh g <sup>-1</sup> at 0.1A g <sup>-1</sup><br>115 mAh g <sup>-1</sup> at 1.6 A g <sup>-1</sup>      | 104.5 mAh g <sup>-1</sup> after 10000 cycles at 1.6 A g <sup>-1</sup> | 4    |
| CNT@FeP-C                         | 1M NaClO <sub>4</sub> in EC/PC                         | 391 mAh g <sup>-1</sup> at 0.2A g <sup>-1</sup><br>258 mAh g <sup>-1</sup> at 5 A g <sup>-1</sup>        | 295 mAh g <sup>-1</sup> after 500 cycles at 0.5 A g <sup>-1</sup>     | 5    |
| FeP/graphite                      | 1M NaClO <sub>4</sub> in EC/DEC                        | 280 mAh g <sup>-1</sup> at 0.05A g <sup>-1</sup><br>56 mAh g <sup>-1</sup> at 2.5 A g <sup>-1</sup>      | 175 mAh g <sup>-1</sup> after 70 cycles at 0.05 A g <sup>-1</sup>     | 6    |
| FeP                               | 1M NaClO <sub>4</sub> in PC+5%FEC                      | 420 mAh g <sup>-1</sup> at 0.05A g <sup>-1</sup><br>60 mAh g <sup>-1</sup> at 0.5 A g <sup>-1</sup>      | 321 mAh g <sup>-1</sup> after 60 cycles at 0.05 A g <sup>-1</sup>     | 7    |
| CoP@C-RGO-NF                      | 1.0 M NaClO <sub>4</sub> in PC =100 vol% with 5.0% FEC | 543 mAh g <sup>-1</sup> at 0.2A g <sup>-1</sup><br>155 mAh g <sup>-1</sup> at 1.6 A g <sup>-1</sup>      | 470 mAh g <sup>-1</sup> after 100 cycles at 0.1 A g <sup>-1</sup>     | 8    |
| Cu <sub>3</sub> P nanowire (CPNW) | 1M NaClO <sub>4</sub> in EC/DEC+5%FE C                 | 362 mAh g <sup>-1</sup> at 0.1A g <sup>-1</sup><br>137 mAh g <sup>-1</sup> at 5 A g <sup>-1</sup>        | 349 mAh g <sup>-1</sup> after 260 cycles at 1 A g <sup>-1</sup>       | 9    |
| MoP@C                             | 1.0 M NaCF <sub>3</sub> SO <sub>3</sub> in DEGDME      | 358 mAh g <sup>-1</sup> at 0.05A g <sup>-1</sup><br>173 mAh g <sup>-1</sup> at                           | 180 mAh g <sup>-1</sup> after 250 cycles at 0.5 A g <sup>-1</sup>     | 10   |

|                                       |                                                        |                                                                                                                                  |                                                                           |    |
|---------------------------------------|--------------------------------------------------------|----------------------------------------------------------------------------------------------------------------------------------|---------------------------------------------------------------------------|----|
| NCP@FCNT<br>-FS                       | 1 M NaClO <sub>4</sub> in<br>PC + 5 wt%<br>FEC         | 1 A g <sup>-1</sup><br>401 mAh g <sup>-1</sup> at<br>0.4A g <sup>-1</sup><br>276 mAh g <sup>-1</sup> at<br>3.2 A g <sup>-1</sup> | 188.9 mAh g <sup>-1</sup><br>after 100 cycles at<br>0.4 A g <sup>-1</sup> | 11 |
| RGO@CoP<br>@FeP                       | 1 M NaClO <sub>4</sub> in<br>PC +5 wt%<br>FEC          | 480 mAh g <sup>-1</sup> at<br>0.1A g <sup>-1</sup><br>374 mAh g <sup>-1</sup> at<br>1A g <sup>-1</sup>                           | 456.2 mAh g <sup>-1</sup><br>after 200 cycles at<br>0.1 A g <sup>-1</sup> | 12 |
| NiCoP-NC                              | 1.0 M NaClO <sub>4</sub><br>in EC/DEC                  | 406.2 mAh g <sup>-1</sup> at<br>0.1A g <sup>-1</sup><br>202.1 mAh g <sup>-1</sup> at<br>3A g <sup>-1</sup>                       | 334.8 mAh g <sup>-1</sup><br>after 200 cycles at<br>0.1 A g <sup>-1</sup> | 13 |
| Ti <sub>3</sub> C <sub>2</sub> /NiCoP | 1 M NaClO <sub>4</sub> in<br>EC:DMC:EMC<br>+ 5 wt% FEC | 416.9 mAh g <sup>-1</sup> at<br>0.1A g <sup>-1</sup><br>240 mAh g <sup>-1</sup> at<br>2A g <sup>-1</sup>                         | 261.7 mAh g <sup>-1</sup><br>after 2000 cycles<br>at 1 A g <sup>-1</sup>  | 14 |
| This work                             | 1M NaSO <sub>3</sub> CF <sub>3</sub><br>in DGM         | 459 mAh g <sup>-1</sup> at<br>0.05A g <sup>-1</sup><br>213 mAh g <sup>-1</sup> at<br>10 A g <sup>-1</sup>                        | 208 mAh g <sup>-1</sup> after<br>1000 cycles at 5<br>A g <sup>-1</sup>    |    |

---



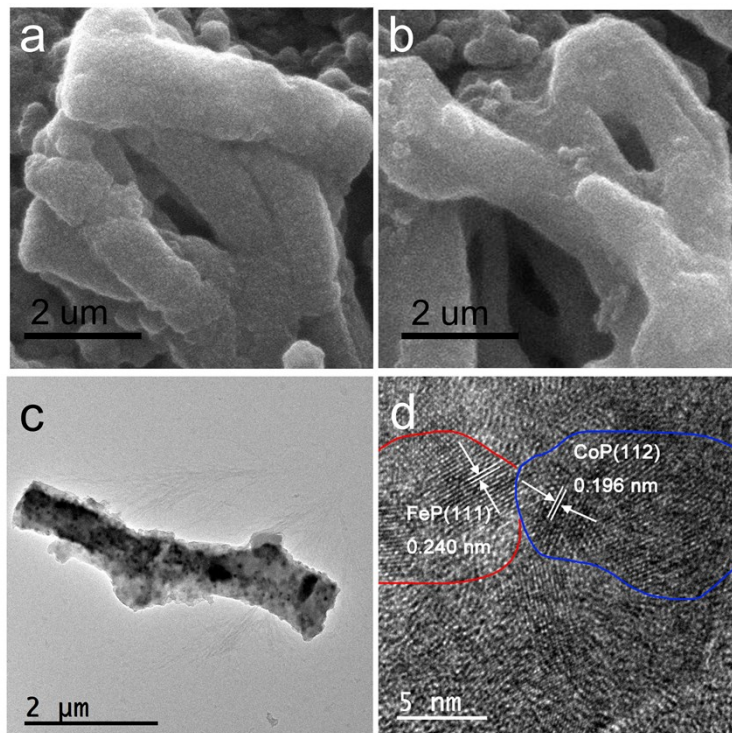

**Fig. S8** (a,b) SEM and (c,d) TEM images of CoP/FeP@PCNFs after 1000 cycles.

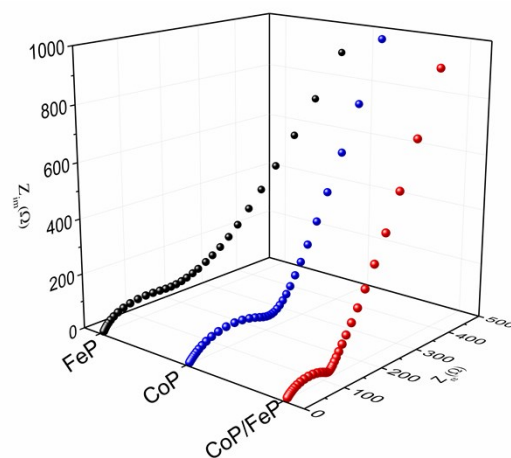

**Fig. S9** EIS spectra of CoP/FeP@PCNFs, CoP@PCNFs and FeP@PCNFs electrodes before cycling.

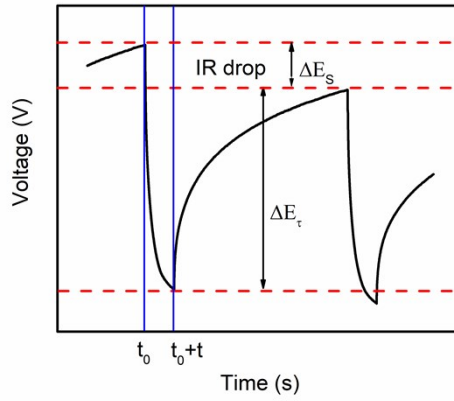

**Fig.S10** Schematic for the calculation method employed. The analysis was based on an applied current of 22 mA g<sup>-1</sup> for 0.5 h, followed by a 3 h relaxation.

GITT tests were performed to characterize sodium-ion diffusion coefficient ( $D_{Na}$ ) in the synthesized samples. The GITT data of CoP/FeP@PCNFs, CoP@CNFs and FeP@PCNFs were recorded at a constant current density of 22 mA g<sup>-1</sup> for an interval of 30 min followed by 180 min relaxation in the first cycle.  $D_{Na}$  value of CoP/FeP@PCNFs electrodes is based on the following Equation:

$$D_{Na^+} = \frac{4}{\pi\tau} \left( \frac{m_B V_m}{M_b S} \right)^2 \left( \frac{\Delta E_s}{\Delta E_\tau} \right)^2$$

where  $\tau$  denotes the constant current pulse time,  $m_B$ ,  $V_m$ , and  $M_b$  are the mass, molar volume, molar mass of the material,  $S$  is the area of electrode-electrolyte interface.  $\Delta E_s$  refers to voltage change during a single-step experiment, and  $\Delta E_\tau$  is the total change of cell voltage during a constant current pulse.

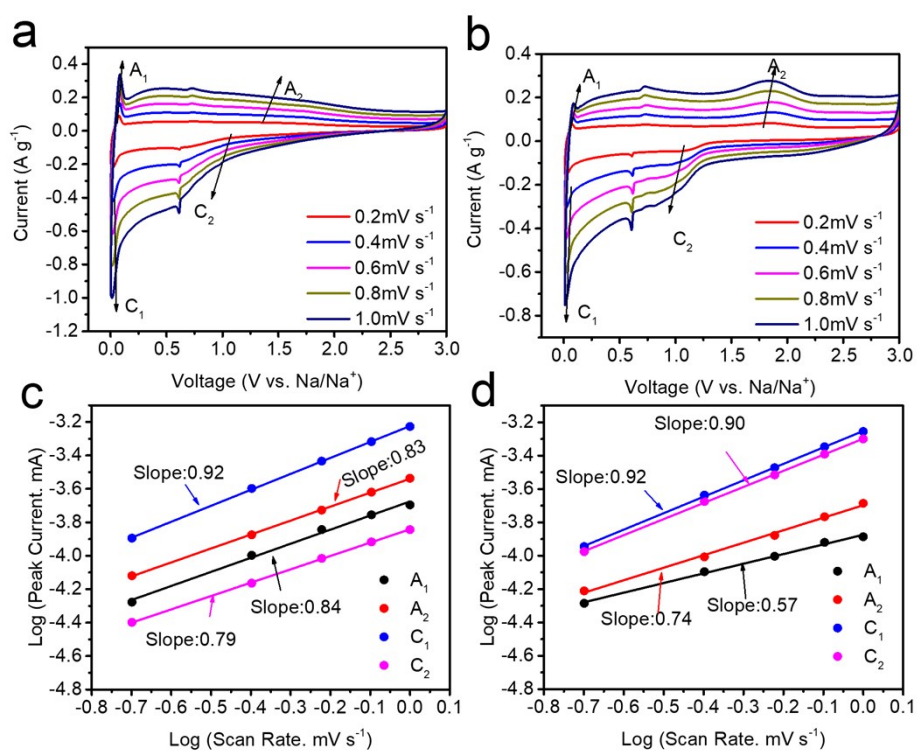

**Fig. S11** CV curves of (a) CoP@PCNFs and (b) FeP@PCNFs electrode at different scan rates. Cathodic and anodic b values of (c) CoP@PCNFs, (d) FeP@PCNFs.

The CASTEP software package requires that the calculation system must be periodic, and the calculation requires that the structure should have a large enough vacuum layer to accurately determine the energy level at the vacuum and eliminate the influence of interlayer interaction<sup>15</sup>. Therefore, a vacuum layer is added to make the total length of Z direction 25 Å to establish periodic cells. BFGS optimization algorithm was used for geometric optimization. The heterogeneous crystal lattice distortion was less than 5% and 2.28%, which is far less than the general requirements for the construction of heterogeneous lattice distortion. The interval between the layers is 3.019 Å, which is close to that of the general two-dimensional van der Waals heterogeneous junction. Therefore, it can be considered that the model constructed by us is reasonable.

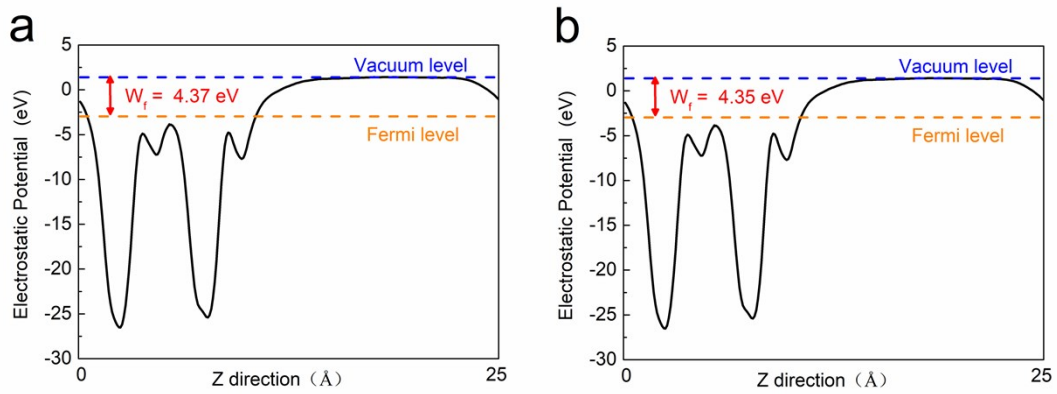

**Fig. S12** Electrostatic potential drop diagram of (a) FeP homogeneous junction and (b) CoP homogeneous junction.

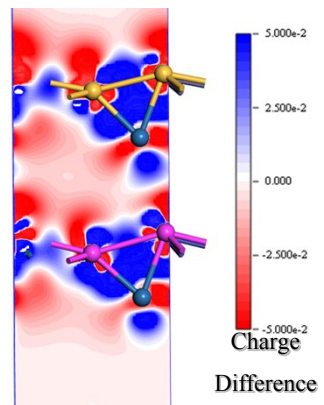

**Fig. S13** Side view of an interlayer differential charge density diagram for a CoP/FeP heterostructure.

**Table. S3** Mean Mulliken charge density of Fe, Co, P atoms in CoP/FeP heterostructure, FeP

homogeneous junction and CoP homogeneous junction.

| System/atom | Fe    | Co    | P      |
|-------------|-------|-------|--------|
| FeP         | 0.115 | /     | -0.115 |
| CoP         | /     | 0.221 | -0.221 |
| FeP/CoP     | 0.143 | 0.266 | -0.125 |

**Notes and references**

1. W. Zhao, X. Ma, G. Wang, X. Long, Y. Li, W. Zhang and P. Zhang, *Appl. Surf. Sci.*, 2018, **445**, 167-174.
2. R. Jin, X. Li, Y. Sun, H. Shan, L. Fan, D. Li and X. Sun, *ACS Appl. Mater. Interfaces*, 2018, **10**, 14641-14648.
3. W.-J. Li, Q.-R. Yang, S.-L. Chou, J.-Z. Wang and H.-K. Liu, *J. Power Sources*, 2015, **294**, 627-632.
4. Z. Huang, H. Hou, C. Wang, S. Li, Y. Zhang and X. Ji, *Chem. Mater.*, 2017, **29**, 7313-7322.
5. F. Han, C. Y. J. Tan and Z. Gao, *Chem. Electro. Chem.*, 2016, **3**, 1054-1062.
6. Q.-R. Yang, W.-J. Li, S.-L. Chou, J.-Z. Wang and H.-K. Liu, *RSC Adv.*, 2015, **5**, 80536-80541.
7. W. J. Li, S. L. Chou, J. Z. Wang, H. K. Liu and S. X. Dou, *Chem. Commun.*, 2015, **51**, 3682-3685.
8. X. Ge, Z. Li and L. Yin, *Nano Energy*, 2017, **32**, 117-124.
9. M. Fan, Y. Chen, Y. Xie, T. Yang, X. Shen, N. Xu, H. Yu and C. Yan, *Adv. Funct. Mater.*, 2016, **26**, 5019-5027.
10. Y. Cao, B. Zhang, X. Ou, Y. Li, C. Wang, L. Cao, C. Peng and J. Zhang, *New J. Chem.*, 2019, **43**, 7386-7392.
11. X.-W. Wang, H.-P. Guo, J. Liang, J.-F. Zhang, B. Zhang, J.-Z. Wang, W.-B. Luo, H.-K. Liu and S.-X. Dou, *Adv. Funct. Mater.*, 2018, **28**, 1801016.
12. Z. Li, L. Zhang, X. Ge, C. Li, S. Dong, C. Wang and L. Yin, *Nano Energy*, 2017, **32**, 494-502.
13. J. Li, L. Shi, J. Gao and G. Zhang, *Chem.-Euro. J.*, 2018, **24**, 1253-1258.
14. D. Zhao, R. Zhao, S. Dong, X. Miao, Z. Zhang, C. Wang and L. Yin, *Energy Environ. Sci.*, 2019, **12**, 2422-2432.
15. S. J. Clark, M. D. Segall, C. J. Pickard, P. J. Hasnip, M. J. Probert, K. Refson and M. C. Payne, *Z. Krist.-Cryst. Mater.*, 2005, **220**, 567-570.
